# Supplementary material
Source: PubMed Central journal article supplement (PMC5098035)
Supplement: 10.1074_M116.061010_mcp.M116.061010-1.pdf [file 10.1074_M116.061010_mcp.M116.061010-1.pdf]

# A role for human N-terminal acetyltransferase Naa30 in maintaining mitochondrial integrity

Van Damme, Kalvik & Starheim *et al.*

## Supplemental data

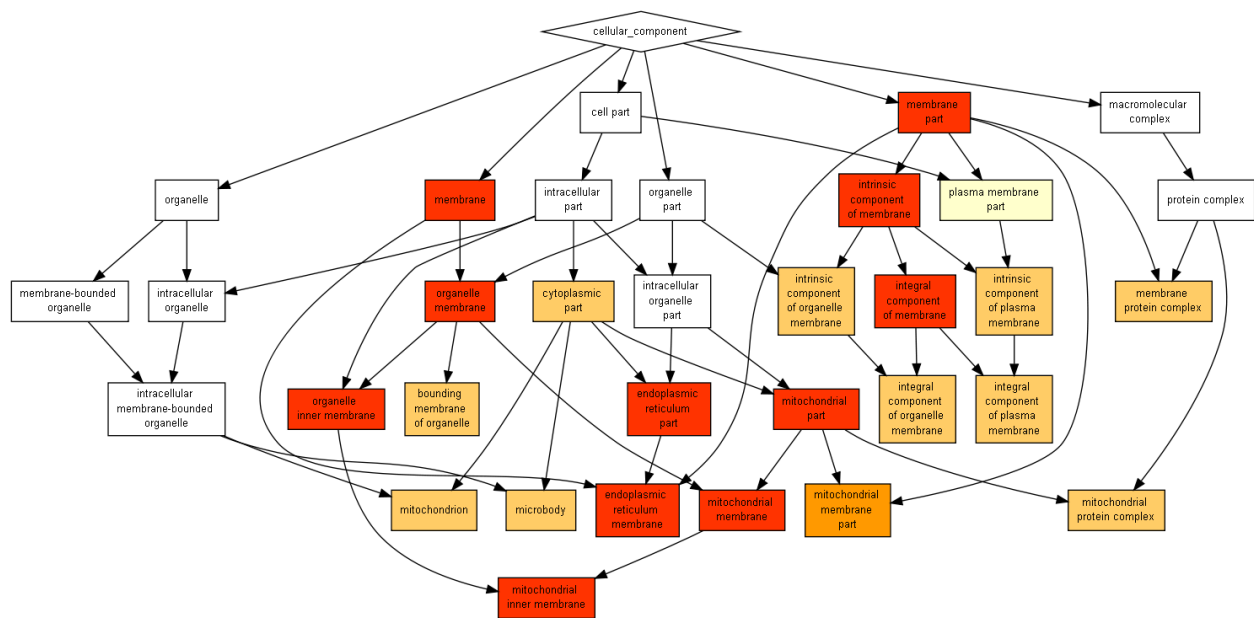

**Supplementary Figure S1| Enriched GO-terms in organelle versus cytosolic enriched fractions.** GOrilla (1) was used to search for enriched GO terms indicative of protein subcellular localization. The proteins exclusively identified in the organelle-enriched fraction (n=209) were used as input protein list against a background list consisting of proteins exclusively identified in the cytosolic fraction (n=623). The resulting enriched GO terms are visualized using a DAG graphical representation with color coding reflecting their degree of enrichment as described in (1). Only GO terms with a p-value > 0.0001 are reported.

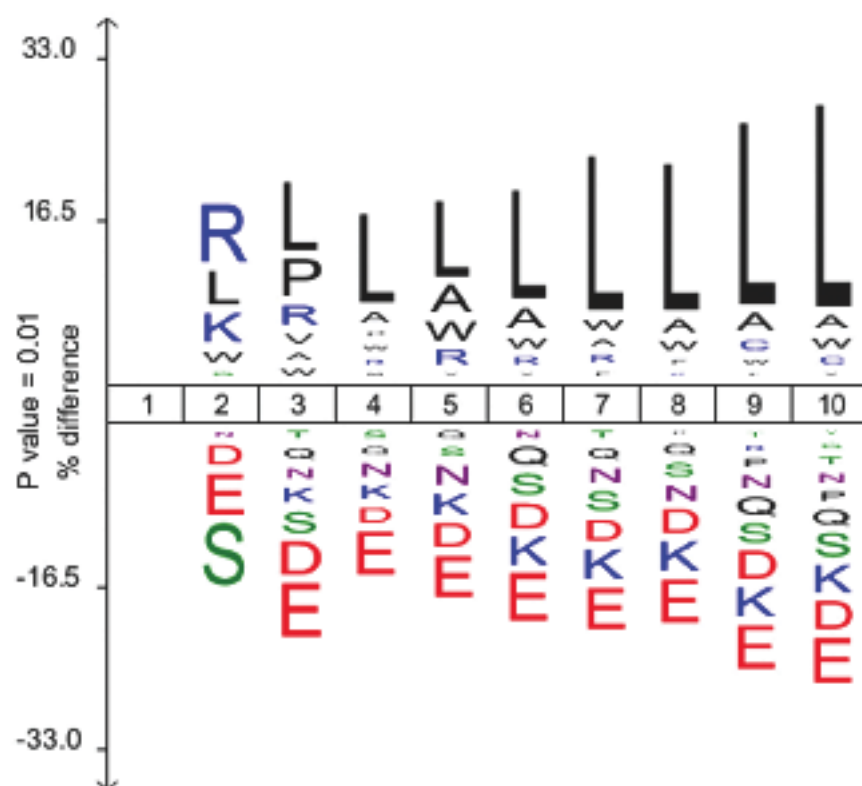

### Supplementary Figure S2| N-terminal amino acid composition of signal sequence containing proteins.

A differential IceLogo representation was created of all human iMet-starting Swiss-Prot N-termini harboring a transit/signal sequence (3930 of 20246 Swiss-Prot entries) versus those lacking an annotated signal/transit sequence. Multiple sequence alignments of peptide substrate motifs are given as 1 to 10, corresponding to the first 10 N-terminal amino acids. Numbering is such that the initiator methionine is at position 1. Statistically significant residues ( $p\text{-value} \leq 0.01$ ) are plotted with the size of the amino acids proportional to the difference in occurrence between both datasets (1).

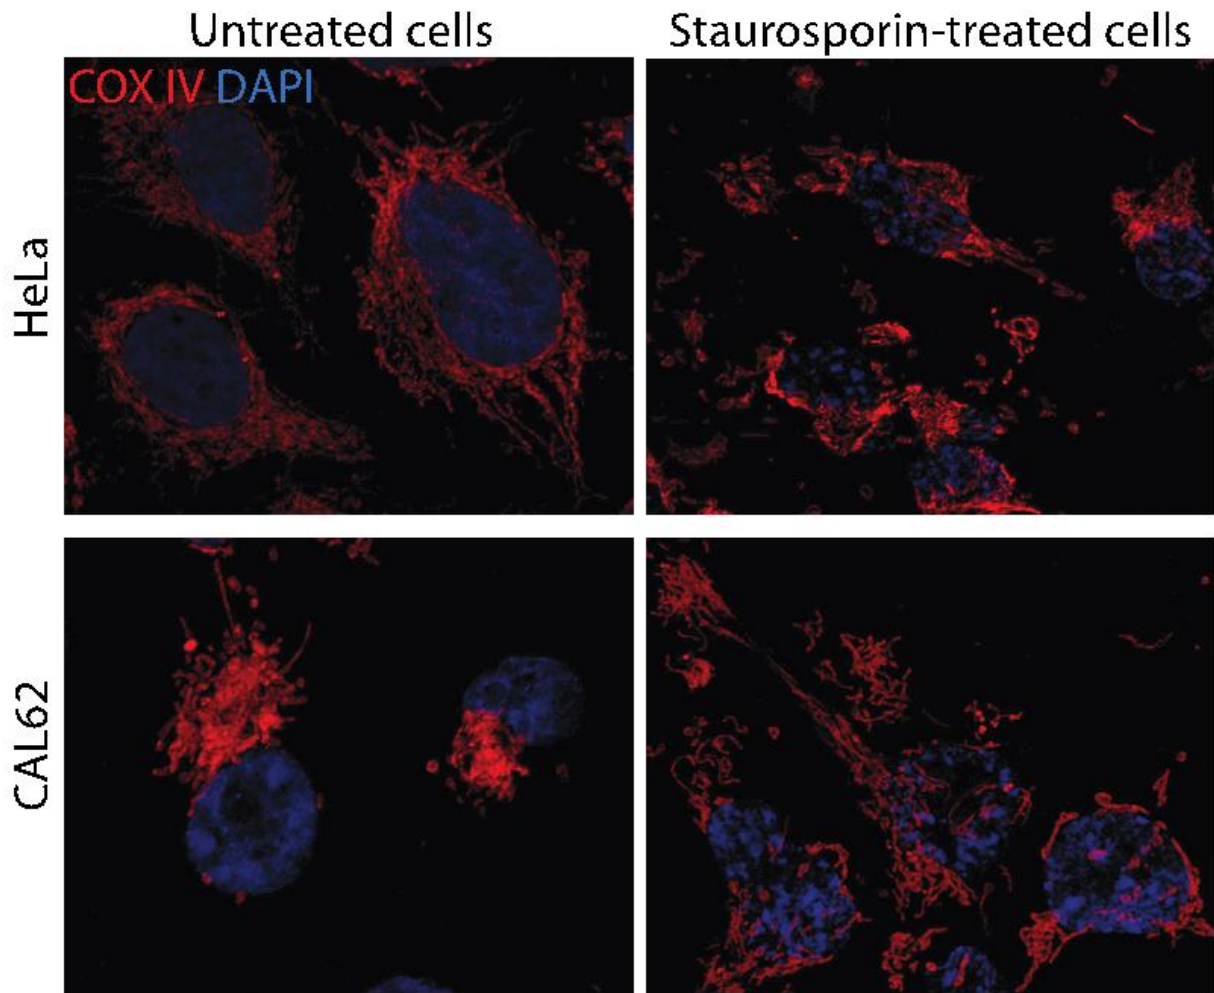

**Supplementary Figure S3| Characterization of the mitochondrial network in cells during apoptosis.**

Confocal micrographs show HeLa and CAL-62 cells immunostained for the mitochondrial marker COX IV-rabbit (red), in both a normal state and during apoptosis. Apoptosis was induced by treating the cells with 2  $\mu$ M staurosporin for 6 hours. DAPI (blue) staining was used to visualize nuclei.

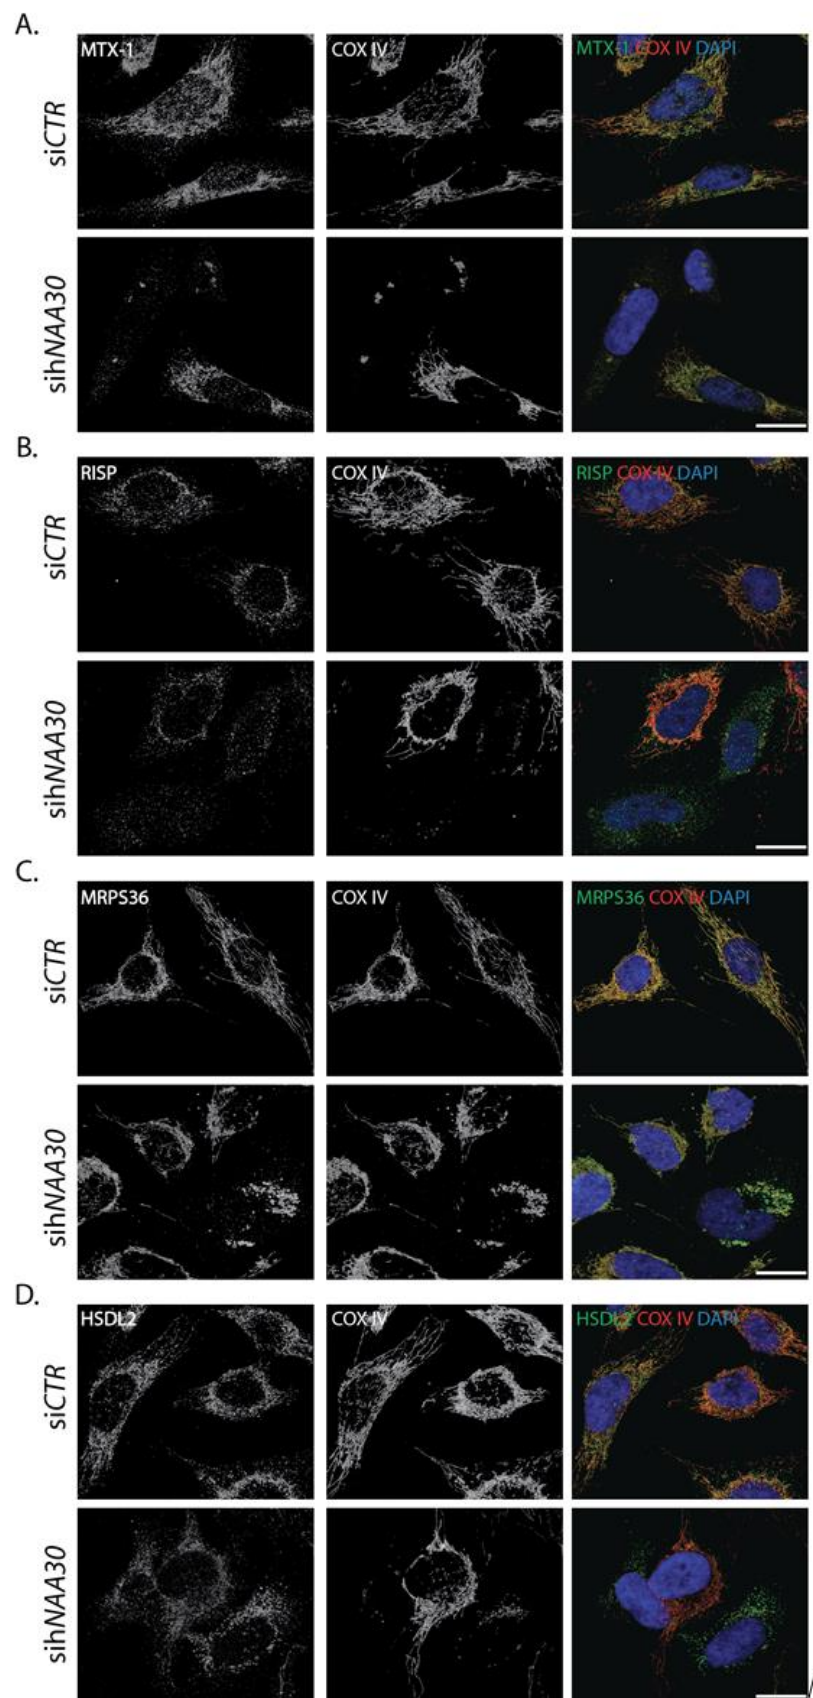

**Supplementary Figure S4| Subcellular localization of selected human NatC mitochondrial substrates upon hNAA30 knockdown.** Confocal micrographs of siRNA treated HeLa cells immunolabelled with **(A)** anti-MTX-1, **(B)** anti-UCRI, **(C)** anti-MRPS36 or **(D)** anti-HSDL2 was co-stained with anti-COX IV. DAPI staining was used to visualize nuclei. White bars correspond to 10  $\mu$ m.

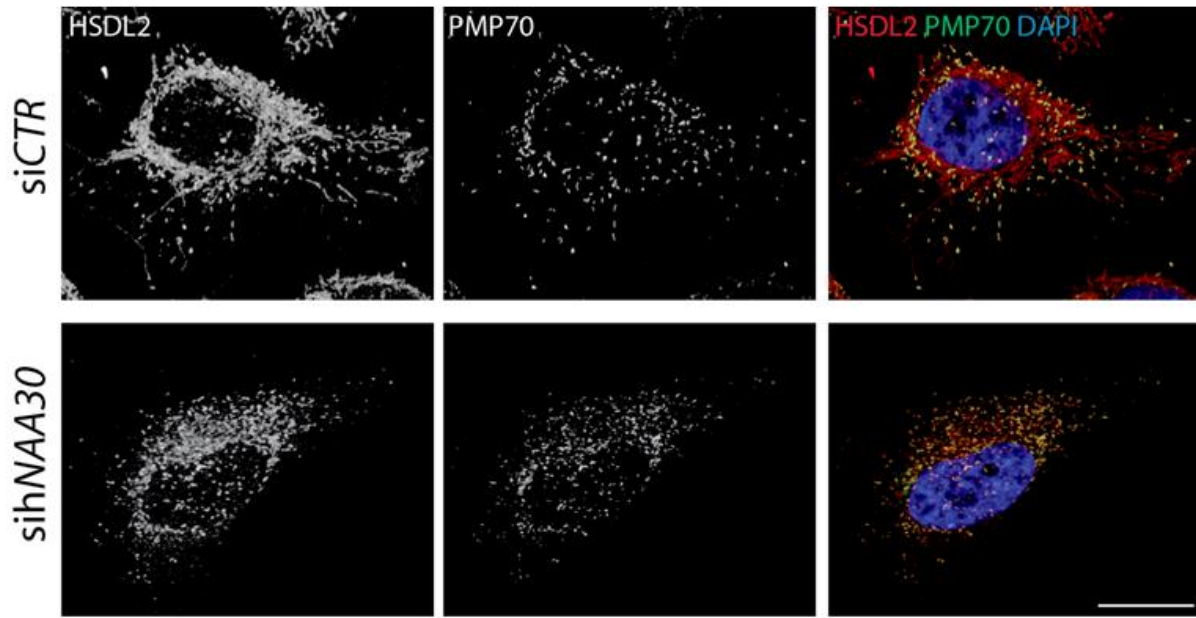

**Supplementary Figure S5 | Subcellular localization of HSDL2 in siCTR and sihNAA30 treated HeLa cells.**

Micrographs show HeLa cells immunostained with anti-HSDL2 (red) and peroxisomal marker anti-PMP70 (green). DAPI staining was used to visualize nuclei. White bar correspond to 10  $\mu$ m.

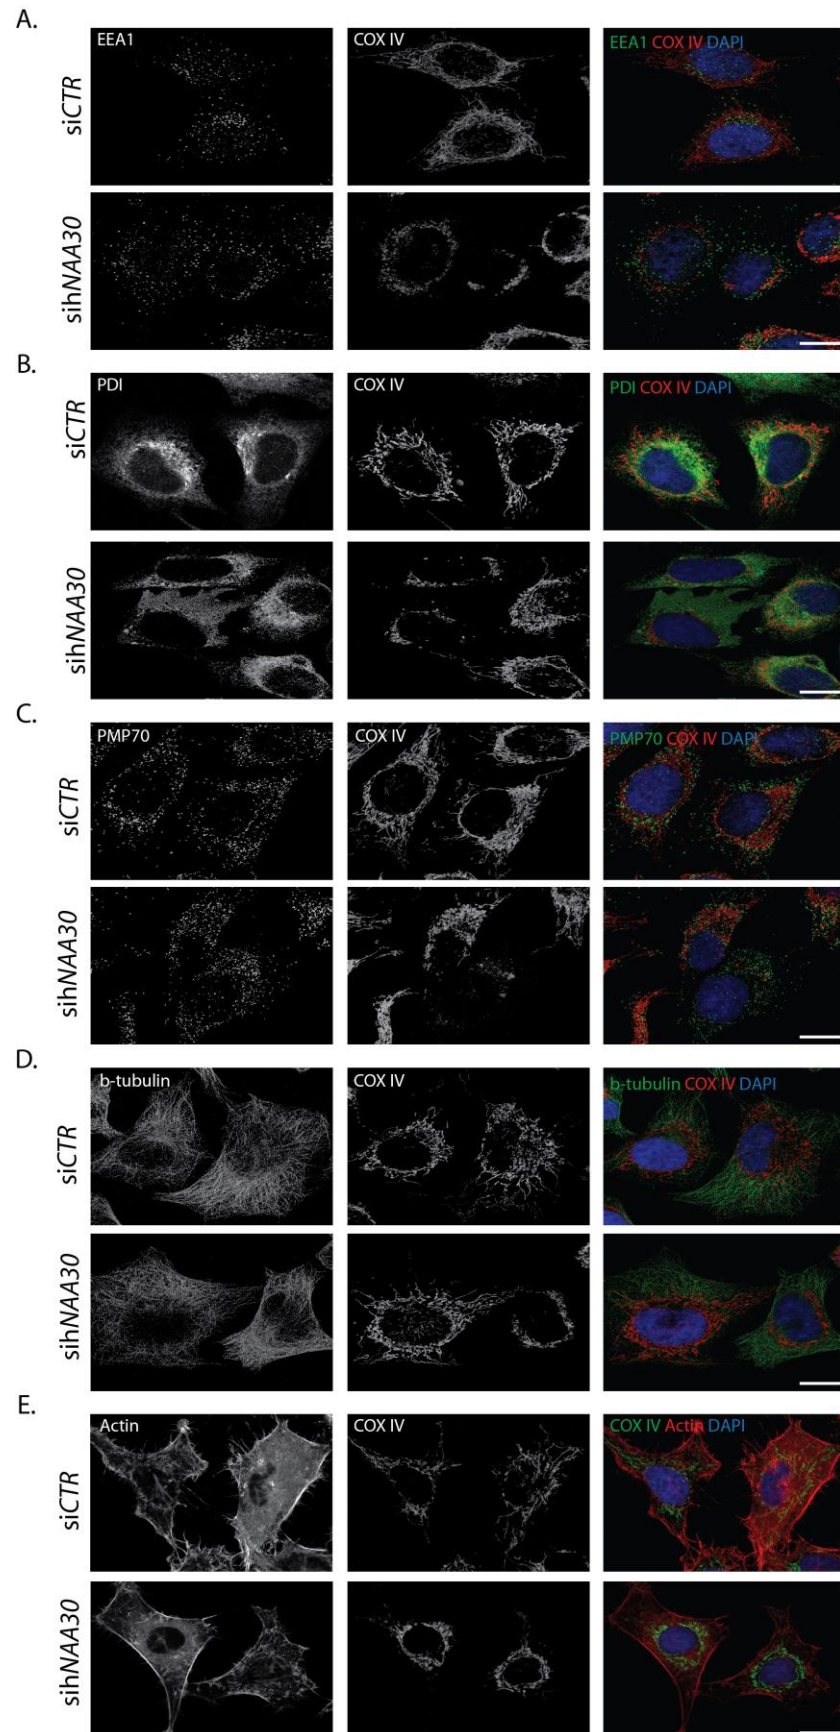

**Supplementary Figure S6: Naa30 depletion does not affect the morphology or distribution of endosomes, ER, peroxisomes, microtubules or the actin cytoskeleton.** Confocal micrographs of siRNA treated HeLa cells immunostained for **(A)** EEA1 probing early endosomes, **(B)** PDI probing the endoplasmatic reticulum, **(C)** PMP70 probing peroxiomes, **(D)**  $\beta$ -tubulin probing microtubules and **(E)** Rhodamine Phalloidin probing F-actin. DAPI staining was used to visualize nuclei. White bars correspond to 10  $\mu$ m.

## References

1. Eden, E., Navon, R., Steinfeld, I., Lipson, D., and Yakhini, Z. (2009) GOrilla: a tool for discovery and visualization of enriched GO terms in ranked gene lists. *BMC bioinformatics* 10, 48
